# Supplementary material for: Structures and mechanisms of CO2 cycloaddition with styrene oxide on bimetallic M–Cu–BTC MOFs (M = Mg, Ca, Al, and Ga): a DFT study
Source: Royal Society of Chemistry journal article supplement (doi:10.1039/d0nj05343k), 2021-01-01
Supplement: d0nj05343k1.pdf [file d0nj05343k1.pdf]

**Structures and Mechanisms of CO<sub>2</sub> cycloaddition with styrene oxide on bimetallic M-Cu-BTC MOFs (M= Mg, Ca, Al, and Ga): A DFT study**

Jakkapan Sirijaraensre\*

**Supporting Information**

**Table S1.** Gibbs free energies (kcal mol<sup>-1</sup>) for the CO<sub>2</sub> cycloaddition with styrene oxide on the Al site of Al-Cu-BTC paddlewheel using different basis sets for non-metal atoms to calculate the electronic energy of complexes.

| Steps  | M06-L/BS1                                    | M06-L/BS2                                   | M06-L/BS3                                   | M06-L/BS4                                   | M06-L/BS5                                   |
|--------|----------------------------------------------|---------------------------------------------|---------------------------------------------|---------------------------------------------|---------------------------------------------|
| SO_ads | -29.2                                        | -29.0                                       | -28.2                                       | -28.2                                       | -27.9                                       |
| TS     | -0.2<br>( $\Delta G_{298}^\ddagger = 29.0$ ) | 0.9<br>( $\Delta G_{298}^\ddagger = 29.9$ ) | 2.0<br>( $\Delta G_{298}^\ddagger = 30.2$ ) | 2.0<br>( $\Delta G_{298}^\ddagger = 30.2$ ) | 3.5<br>( $\Delta G_{298}^\ddagger = 31.4$ ) |
| SC_ads | -15.2                                        | -13.0                                       | -11.2                                       | -11.6                                       | -10.3                                       |

**BS1** = 6-31G(d,p) + SDD

**BS2** = 6-311G(d,p) + SDD

**BS3** = 6-311++G(d,p) + SDD

**BS4** = 6-311G(2d,2p) + SDD

**BS5** = 6-311G(2df,2p) + SDD

**Table S2.** Gibbs free energies (kcal mol<sup>-1</sup>) for the CO<sub>2</sub> cycloaddition with styrene oxide on the Al site of Al-Cu-BTC paddlewheel using different DFT functionals with the 6-311G(d,p) + SDD mixed basis set for calculating electronic energy of complexes.

| Steps  | M06-L <sup>a</sup>                          | M06-L-D3 <sup>a</sup>                        | M06 <sup>a</sup>                            | B3LYP <sup>a</sup>                           | B3PW91 <sup>a</sup>                          |
|--------|---------------------------------------------|----------------------------------------------|---------------------------------------------|----------------------------------------------|----------------------------------------------|
| SO_ads | -29.0                                       | -31.3                                        | -27.4                                       | -21.1                                        | -17.6                                        |
| TS     | 0.9<br>( $\Delta G_{298}^\ddagger = 29.9$ ) | -2.2<br>( $\Delta G_{298}^\ddagger = 29.1$ ) | 2.9<br>( $\Delta G_{298}^\ddagger = 30.3$ ) | 10.0<br>( $\Delta G_{298}^\ddagger = 31.1$ ) | 15.1<br>( $\Delta G_{298}^\ddagger = 32.7$ ) |
| SC_ads | -13.0                                       | -15.7                                        | -16.6                                       | -9.1                                         | -7.4                                         |

<sup>a</sup>The free energy corrections were taken from calculations using M06-L/6-31G(d,p) + SDD mixed basis set.

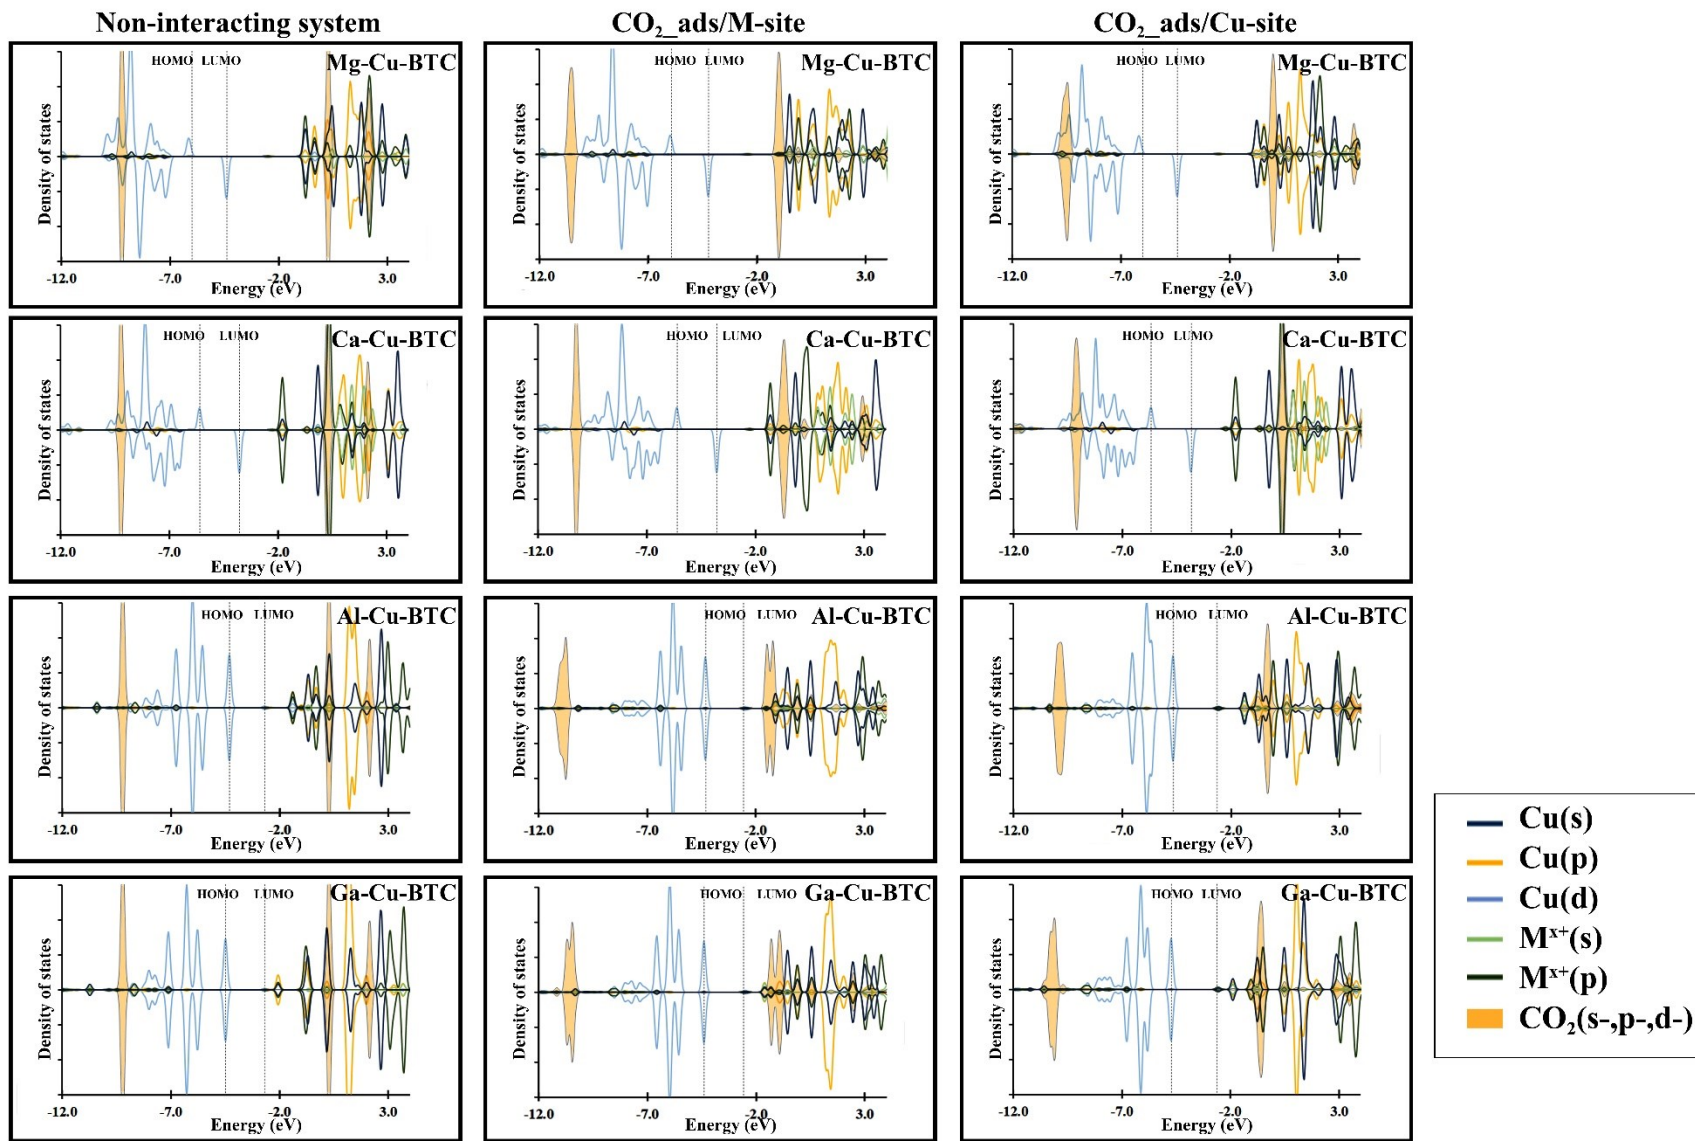

**Fig. S1.** Plots of density of states projected on atomic orbitals of Cu and substituted metal atoms of bimetallic paddlewheel nodes and the CO<sub>2</sub> molecule in the CO<sub>2</sub> adsorption complexes and the non-interacting systems are compared.

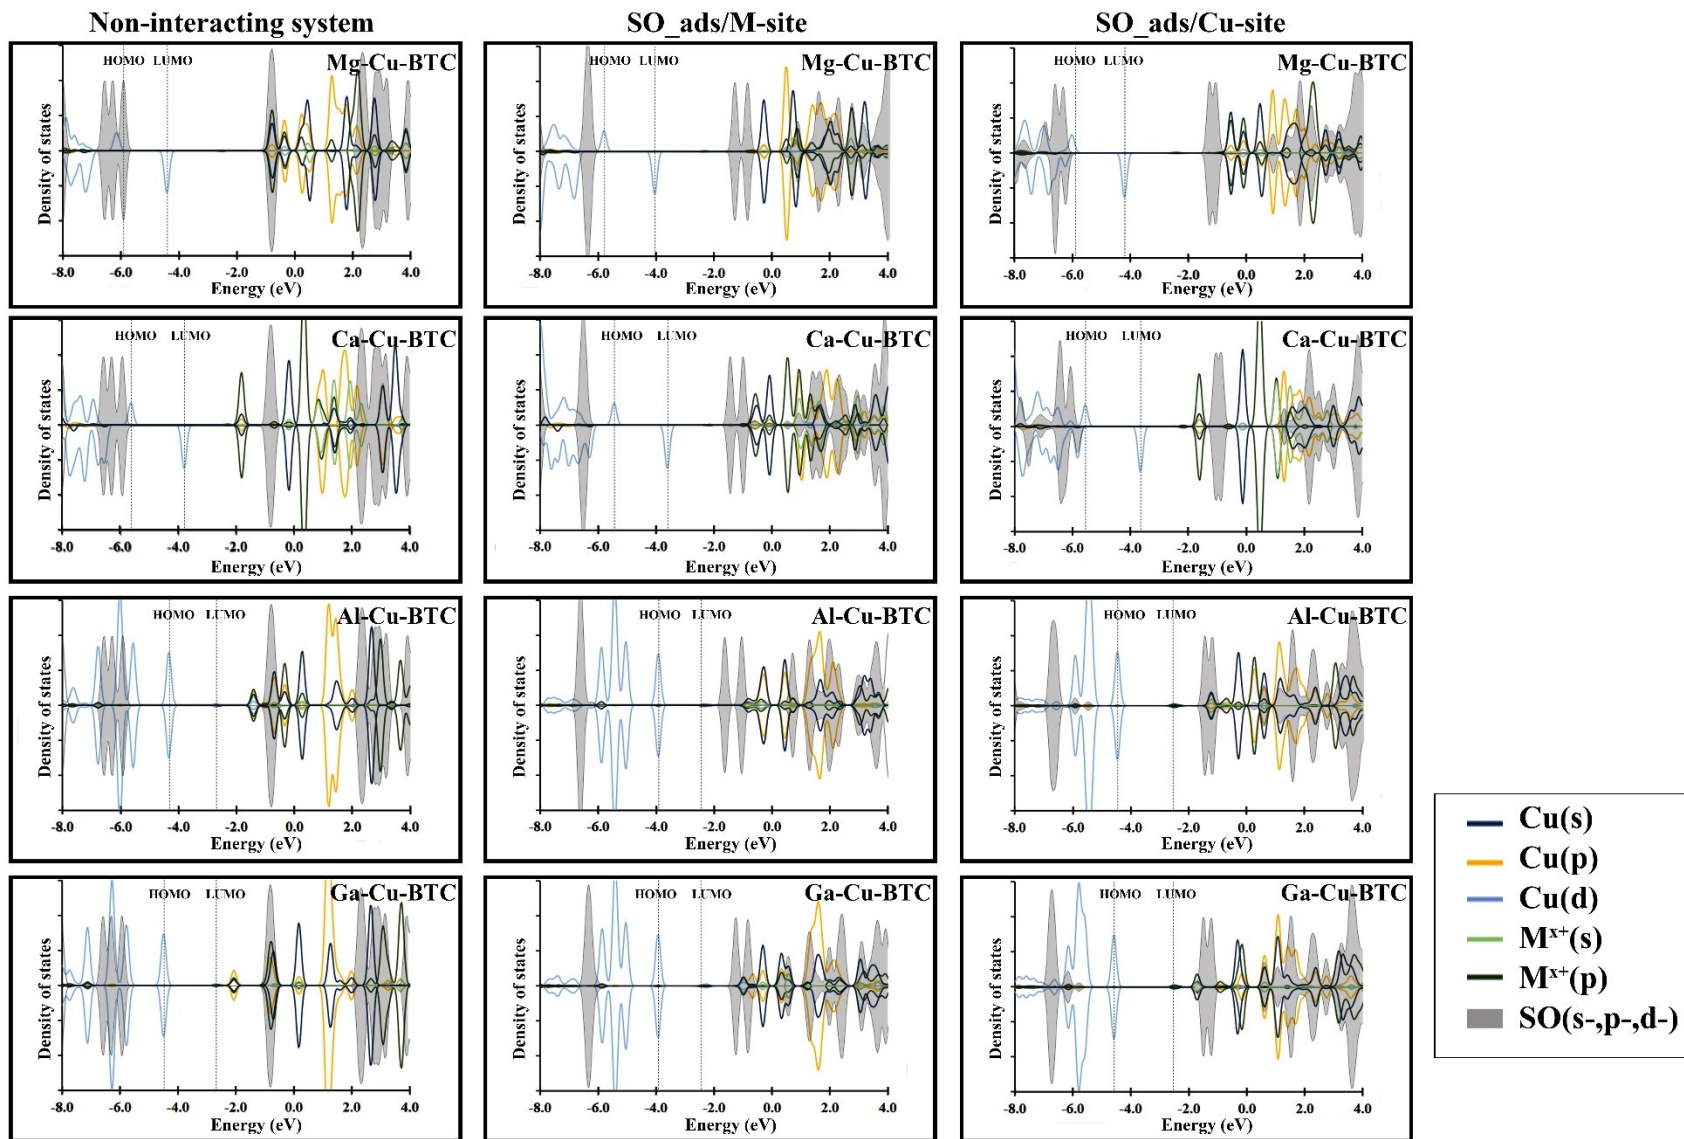

**Fig. S2.** Plots of density of states projected on atomic orbitals of Cu, substituted metal atoms of bimetallic paddlewheel nodes and the styrene oxide (SO) molecule in the SO adsorption complexes and the non-interacting systems are compared.
